# Supplementary material for: Cytoplasmic intermediate filaments mediate actin-driven positioning of the nucleus
Source: Oxford University Press journal article supplement (doi:10.1242/jcs.076356), 2011-03-05
Supplement: jcs076356figs8.pdf [file jcs076356figs8.pdf]

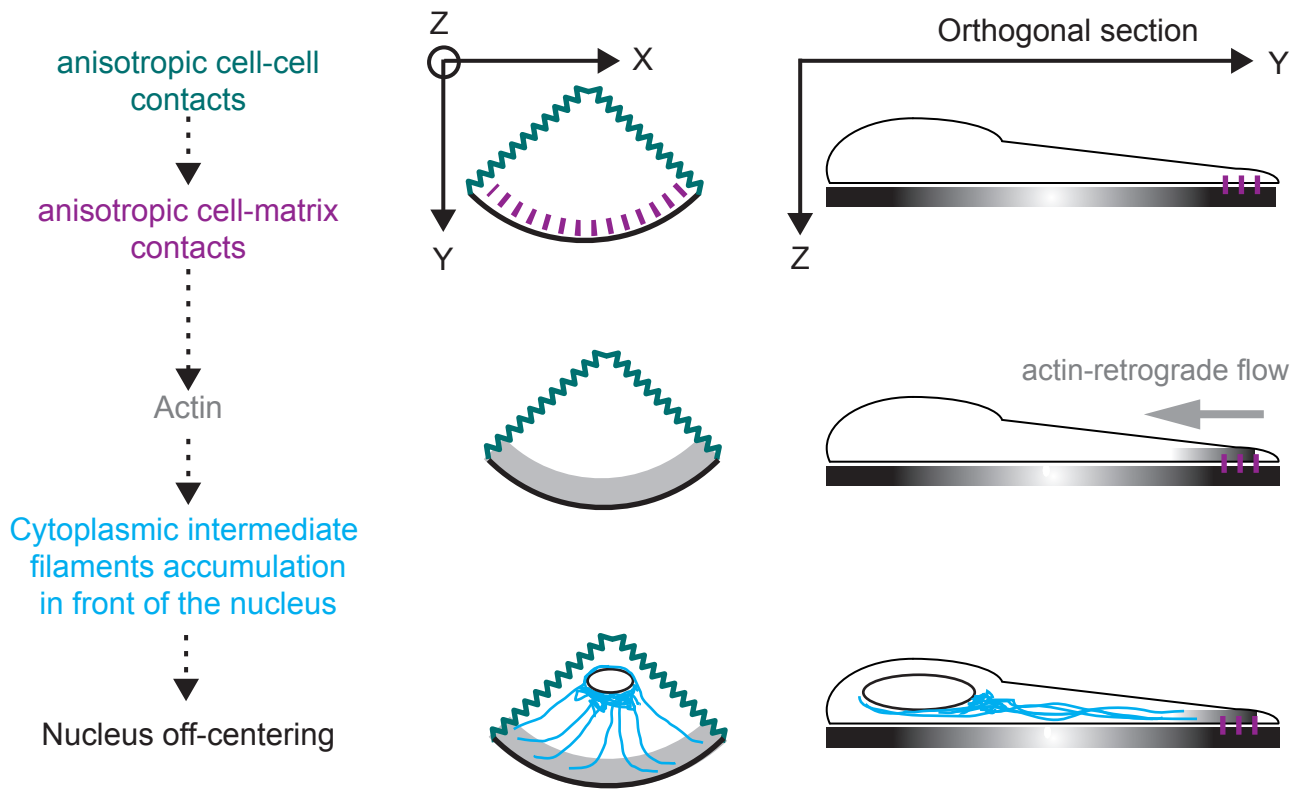

## LEGENDS:

||||| Cell-matrix contacts

■ Actin-rich area

○ Nucleus

~~~~~ Cell-cell contacts

↑ Actin-retrograde flow

— Cytoplasmic intermediate filaments
